# Supplementary material for: Selective PPAR-Delta/PPAR-Gamma Activation Improves Cognition in a Model of Alzheimer’s Disease
Source: MDPI journal article supplement (doi:10.3390/cells12081116), 2023-04-08

Supplemental Figure S1: Markers for Neurotransmission

Markers for Neurotransmission

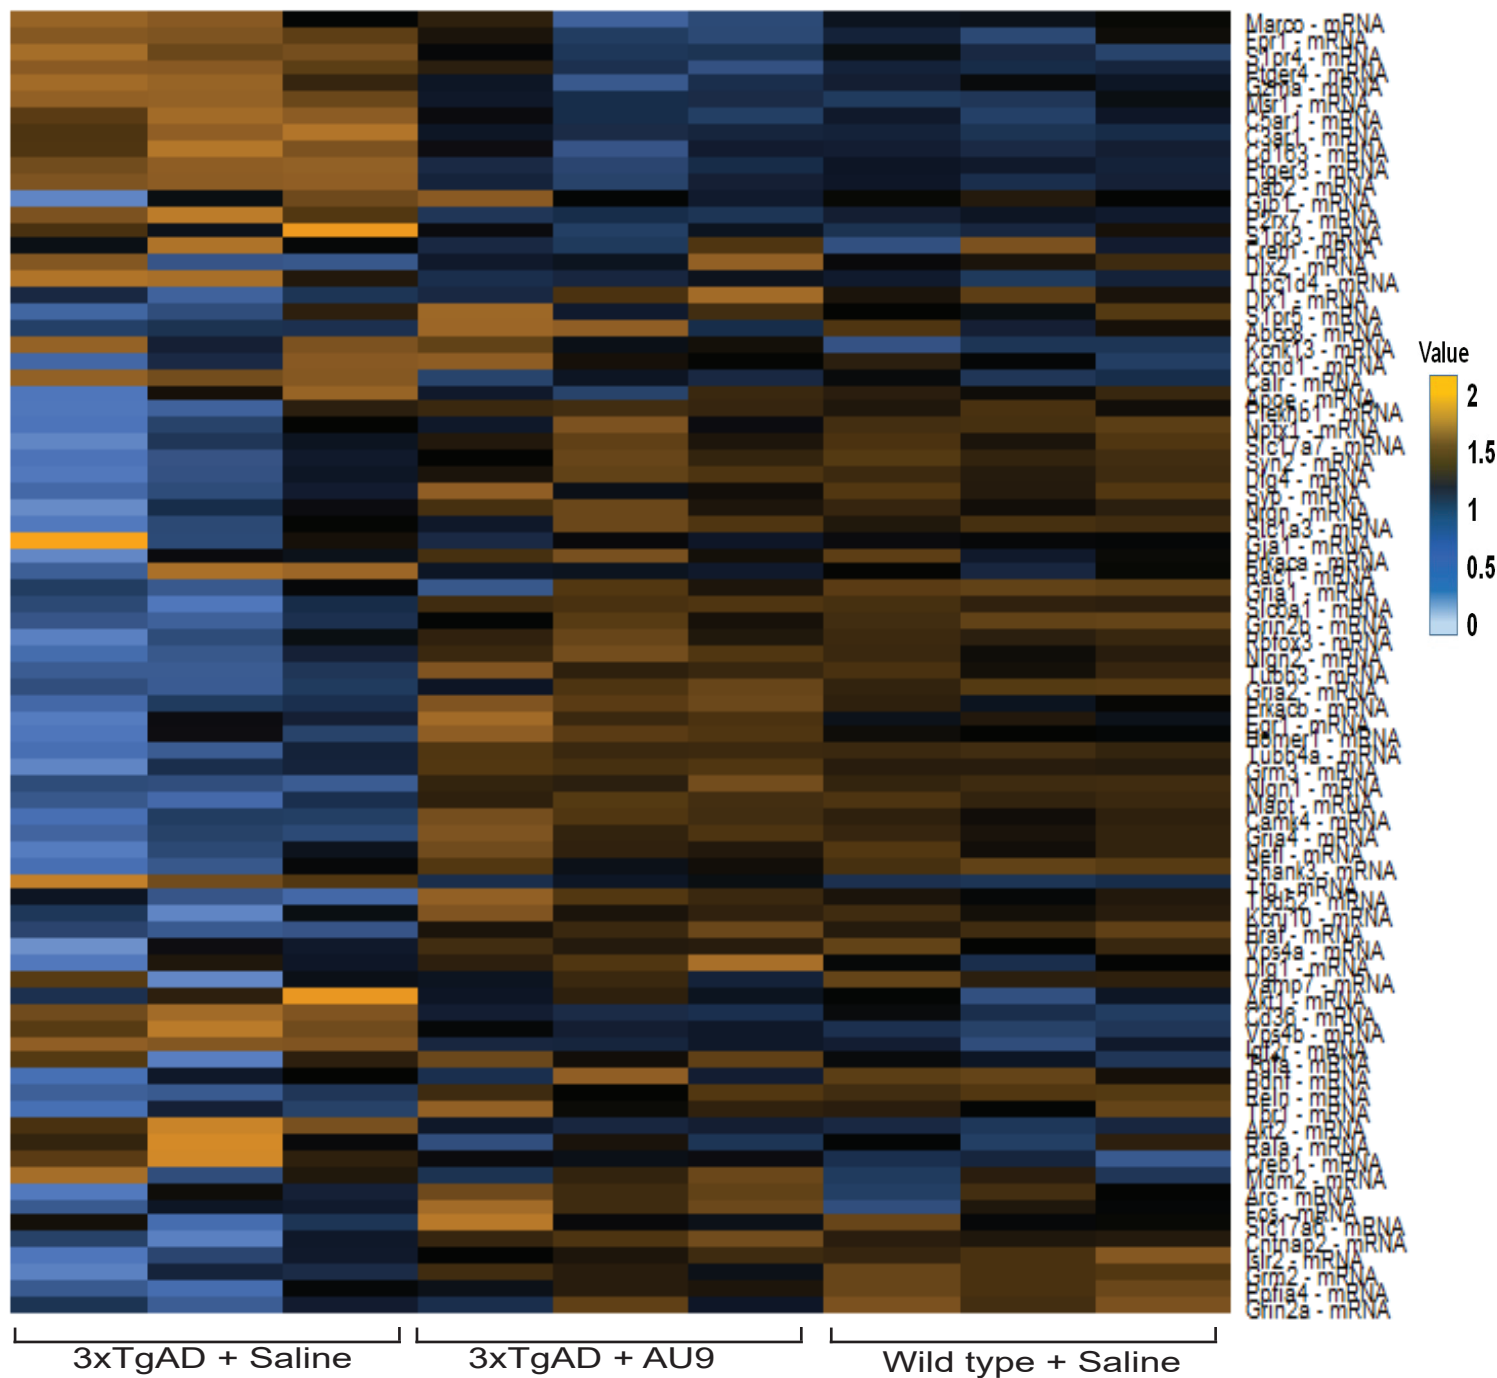

## Markers for cellular stress

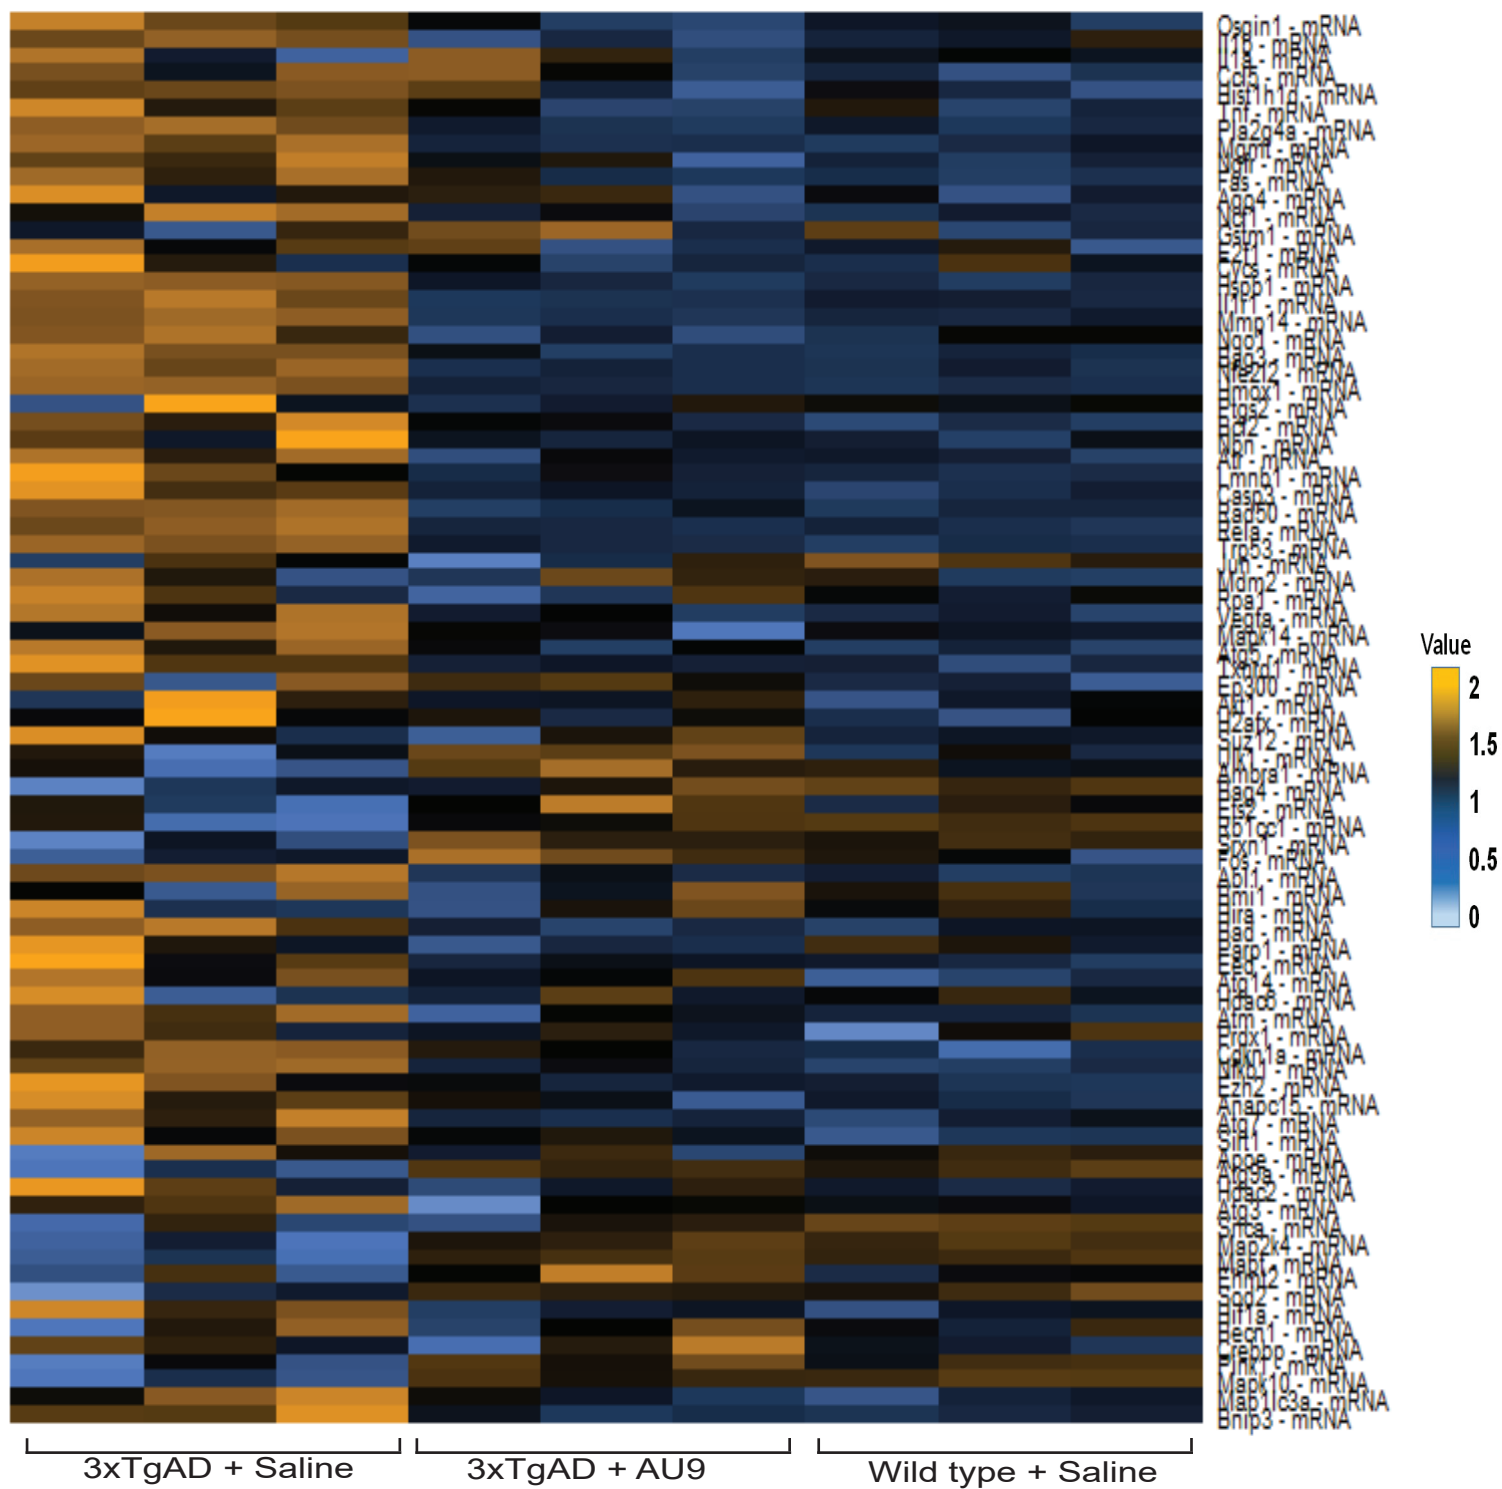

Supplemental Figure S3: Cytokines

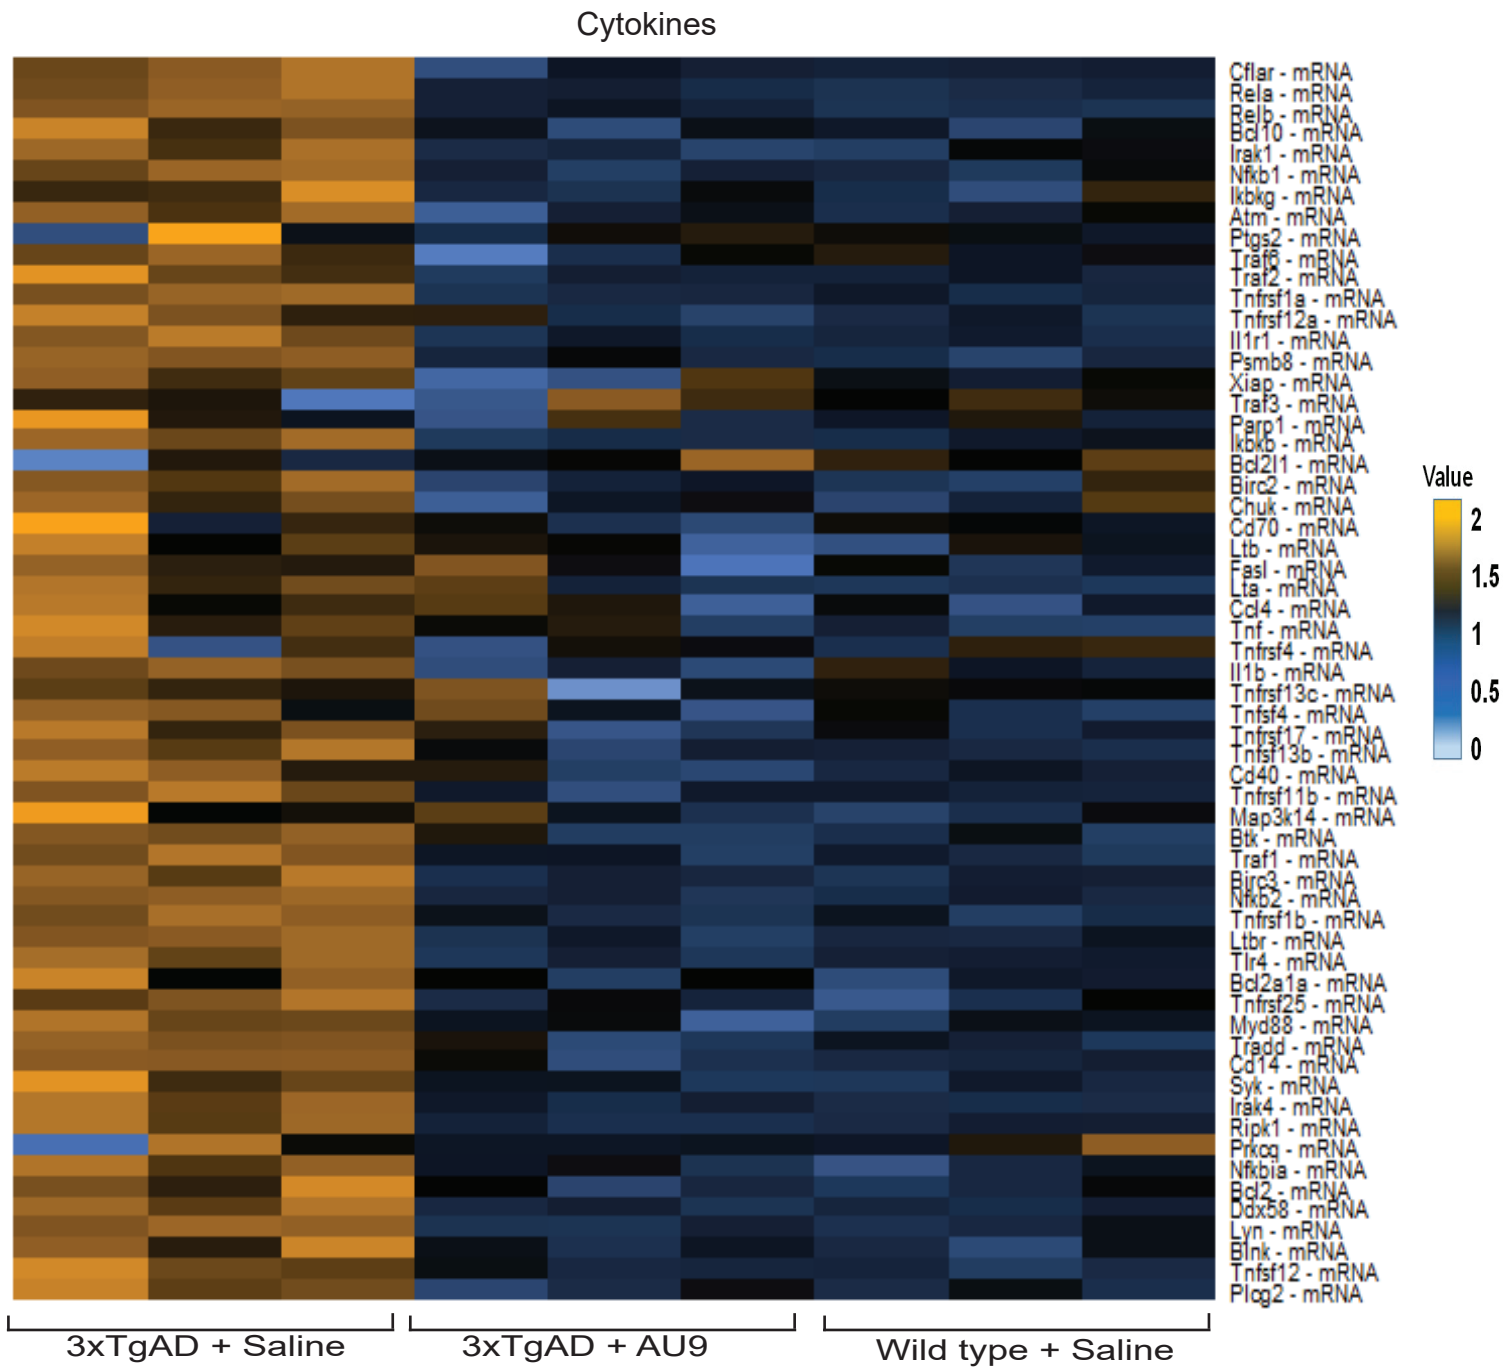

### Supplemental Figure S4: Markers for DNA Damage

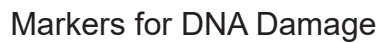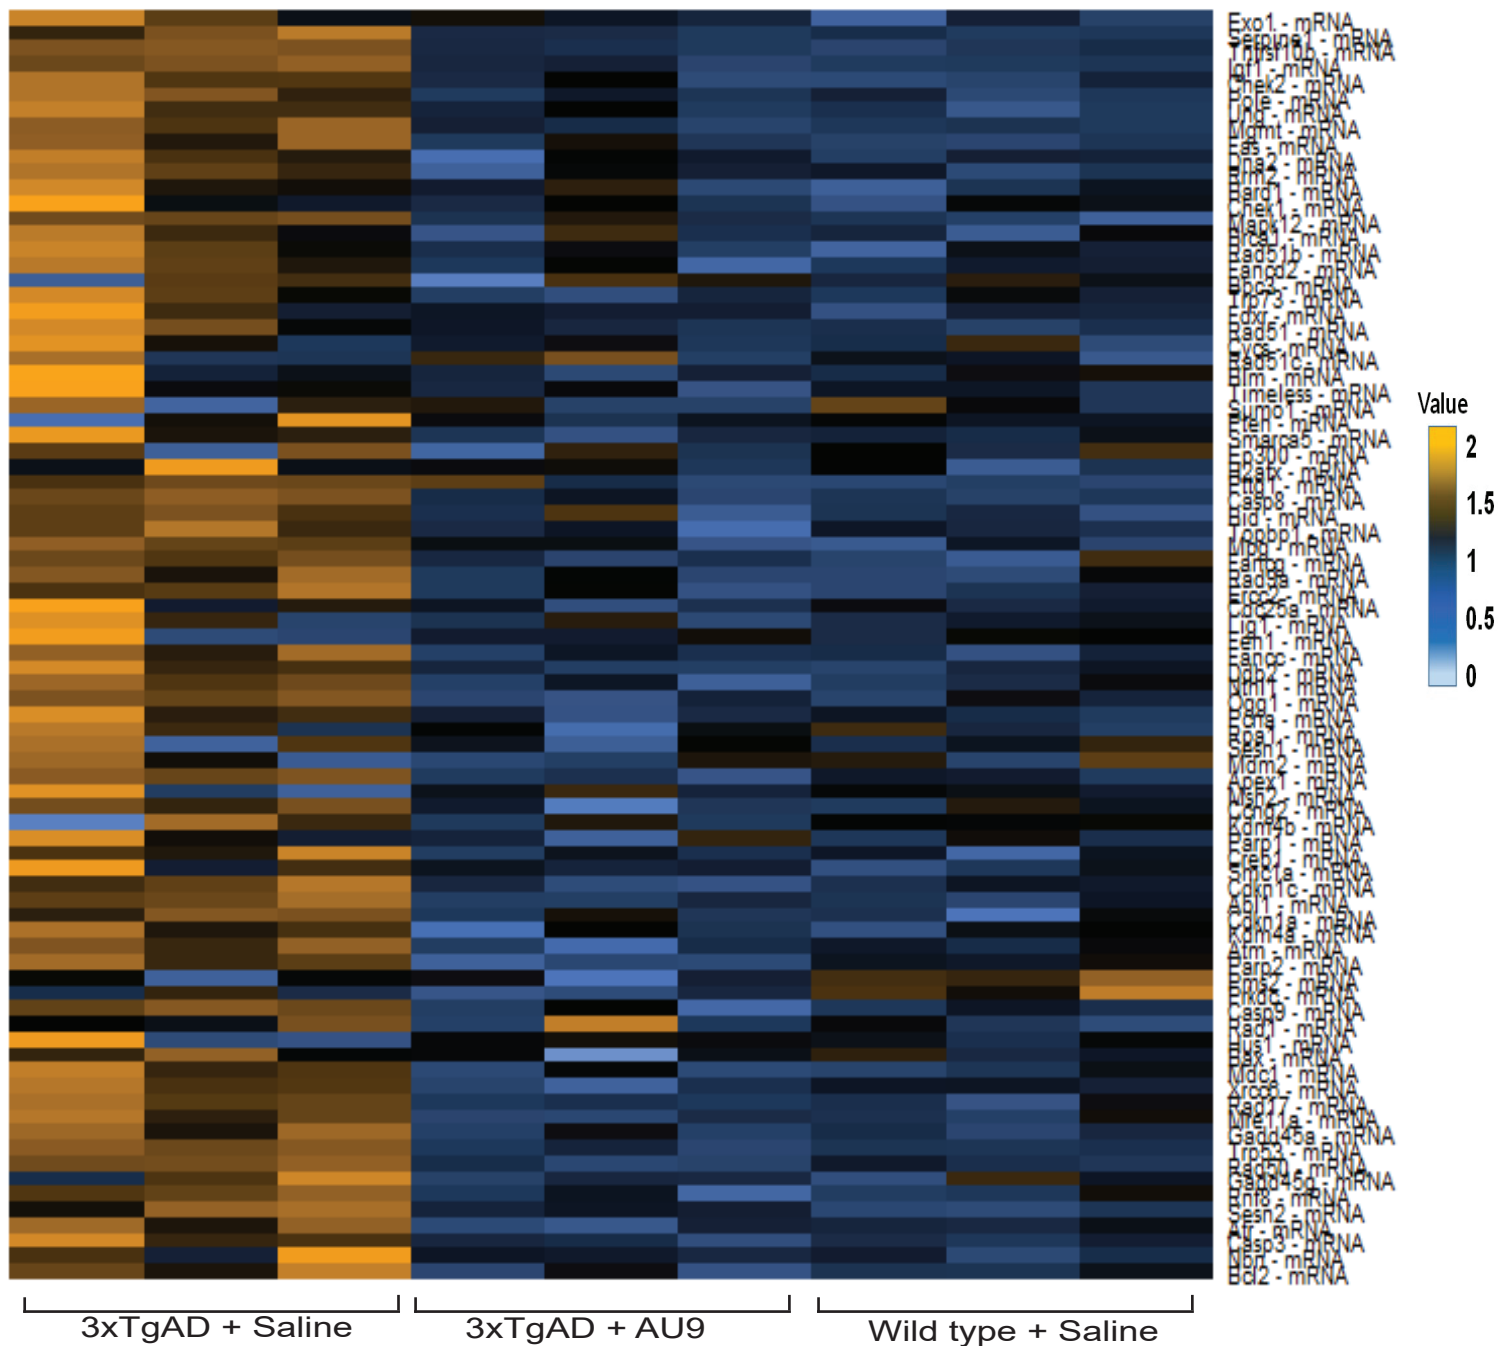

## Supplemental Figure S5: QPCR primers for Figure 3C

### QPCR primers for Figure 3C

|       |                                                                        |
|-------|------------------------------------------------------------------------|
| PDK1  | GATAGTCTTGAGCCACCAAGTAG (Sense)<br>CCACACAGGGACCACATAAA (AntiSense)    |
| CPT1b | TCTACCTCCCAAGTGCTAAGA (Sense)<br>ACTCTCCTGGTCTGTGGATAA (AntiSense)     |
| LCAD  | GGTCAGGAGAGCTAATGGAAAG (Sense)<br>GAGAGATGGCTCAGTGGTTAAG (AntiSense)   |
| UCP1  | GGTCAGGAGAGCTAATGGAAAG (Sense)<br>GAGAGATGGCTCAGTGGTTAAG (AntiSense)   |
| UCP3  | GGTCAGGAGAGCTAATGGAAAG (Sense)<br>GAGAGATGGCTCAGTGGTTAAG (AntiSense)   |
| PGC1a | GGTCAGGAGAGCTAATGGAAAG (Sense)<br>GAGAGATGGCTCAGTGGTTAAG (AntiSense)   |
| FABP3 | GGTCAGGAGAGCTAATGGAAAG (Sense)<br>GAGAGATGGCTCAGTGGTTAAG (AntiSense)   |
| LPL   | CCCTGGAAGTGGGAAAGAATAG (Sense)<br>GGTGCCTCTATCACAGCAATAA (AntiSense)   |
| ACS   | GTGTGTGTGTGTGTGTGTTATG (Sense)<br>GAGAAGGGAGCCACAATTAAGA (AntiSense)   |
| ILK   | GAGCTTCTCCGAGGTTTCATTAC (Sense)<br>CAAAGCTGAAGGACAGAGGATAG (AntiSense) |
| UBC   | GGGACTGCTGTGGTTTCATA (Sense)<br>GGTGGA CTCTTTCTGGATGTT (AntiSense)     |
| PGAR  | CAGAAAGAGGAGGCAGGTAAAG (Sense)<br>CGTGGGATAGAGTGGAAGTATTG (AntiSense)  |
| COX1  | GAATAGTAGGCACCGCACTAAG (Sense)<br>GGAGTAGCACGGCTGTAATAAG (AntiSense)   |
| NRF1  | CCCAGAACAAGACCCAGTAAG (Sense)<br>TCCTGAGGGAGTACCAGAATAG (AntiSense)    |
| TFAM  | CGGCCACTGTGTACTCATATAC (Sense)<br>CCATCTCCATTTCTCCCTCATT (AntiSense)   |

# Supplemental Figure S6: QPCR primers for Figure 8A (1)

## QPCR primers for Figure 8A

|         |                                     |
|---------|-------------------------------------|
| ADCy8   | GCGGGATGGGATGGAATAAA (Sense)        |
|         | GTGAGGCAAGCCAGTAAAGA (AntiSense)    |
| Adra2a  | CTCGCTGAACCCTGTTATCTAC (Sense)      |
|         | GACCGCCCTGAATGATCTTTAT (AntiSense)  |
| C1qa    | GGAGAGTAGGCAGATGTTTGT (Sense)       |
|         | CCAGTCTAGGGCCATTCATATC (AntiSense)  |
| C1qb    | CCAGAGCACCAATCCATCTT (Sense)        |
|         | GCCTACCCACTTCTTCATCTATC (AntiSense) |
| CD33    | CCCACCTAGCCAAGATTCTAAC (Sense)      |
|         | GGCGTCTCTTCACAGCAATA (AntiSense)    |
| Csf1r   | CCCTCTAACCAGGGTCTCTAA (Sense)       |
|         | CACCAGGGTGAGTCTTCTAATG (AntiSense)  |
| Csf2rb  | GGGCTCTGTCTGGTCAATATAAG (Sense)     |
|         | GCACGAGTATTCAGTCCCTAAC (AntiSense)  |
| Ctse    | AGGAACCACCTAGTCCTCTATC (Sense)      |
|         | AGTAGGCGCATTGATCCTTATC (AntiSense)  |
| Trem2   | GTGGTAGTGCCAGTAGTGTAAG (Sense)      |
|         | GGGCTCCAGTCTTGTGTAAT (AntiSense)    |
| IGF1r   | CCAAAGACGAGAGAGGTAGAAAG (Sense)     |
|         | CAGAGGGCTGTTAGGATGTATG (AntiSense)  |
| Cxxl11  | GCATCCAGGTAGTGACCATAAA (Sense)      |
|         | CCTAGAGGAGGTGTAGAGAGAAA (AntiSense) |
| Csc16   | CACCTGAAACCGGGACATAATA (Sense)      |
|         | TCTCTCTCTCTCTCTCTCTCT (AntiSense)   |
| Cybb    | CACCCATTGTCTCCTTCTACTC (Sense)      |
|         | CTGTCCTTCTCTCTTCCTCATTC (AntiSense) |
| Il13ra1 | GCACTGGATGCTGTCTTATCT (Sense)       |
|         | CATGCCTATCTCTGAAGTTGT (AntiSense)   |
| Il1b    | TCAGGAATGGAGGGCTATCT (Sense)        |
|         | AGTGTGTGGGTTGCCTTATC (AntiSense)    |

Supplemental Figure S7: QPCR primers for Figure 8A (2)

QPCR primers for Figure 8A

|        |                                     |
|--------|-------------------------------------|
| Il1r1  | CTCTGTACCTGCTCTTGGAATG (Sense)      |
|        | GCCTGGGTCCAGTAGAATTAAG (AntiSense)  |
| Il10ra | GGCTTTCTGGATGTGGTAAGA (Sense)       |
|        | CTGGGTCTGCAGTTAGAGATTAG (AntiSense) |
| HGF    | GTTGTCAGGTTCCCAGGAATAG (Sense)      |
|        | GGAAGGATGGAAGGAGCTAAAG (AntiSense)  |
| Inhbb  | CAGCAGAGTCCATTCCCTATTG (Sense)      |
|        | CCTCACAGTAGTTCCCGTAGTA (AntiSense)  |
| Itga5  | GAAGAGGAAGGGCTAGGATAGA (Sense)      |
|        | GGAGACACTGAAGAGGAGGATA (AntiSense)  |
| Lif    | TGGCTTCATCACTCCACTATTC (Sense)      |
|        | CAGGTGCTTCTTACAGGTCTAC (AntiSense)  |
| MMP24  | AAGGACTGTGTCTTCTGTCTTG (Sense)      |
|        | CAGGTTGGAGGGAGATGTTTAG (AntiSense)  |
| MMP9   | CCAATCTTAGCCTCTGCCTATC (Sense)      |
|        | GATGCCGTCTATGTCGTCTTTA (AntiSense)  |
| NGFr   | CGCTCTTGATGGACACTTATCT (Sense)      |
|        | GCTGTTGGCTCCTTGTTTATTT (AntiSense)  |
| P2ry12 | GGTCAGAAGTGAGGCAGTAAG (Sense)       |
|        | TTCCCTGTGGTTGGGTAAAG (AntiSense)    |
| Scamp2 | CTGGAGAGGTGTCTTGCTATTC (Sense)      |
|        | GGCTGGCCCAGAACTTATT (AntiSense)     |
| Sla    | CTTCCCTGGATGGTGTGTATTT (Sense)      |
|        | GGTGACAAGTGAGTGGGAATAG (AntiSense)  |
| TNF    | AGGGAAAGAAGTGGGCTAATG (Sense)       |
|        | CTGCCCTTCCTCCATCTTAAA (AntiSense)   |

Supplemental Figure S8: Western Whole blots for PSD95, GluA1, GluA2, and the associated standardizing  $\alpha$ -Actin

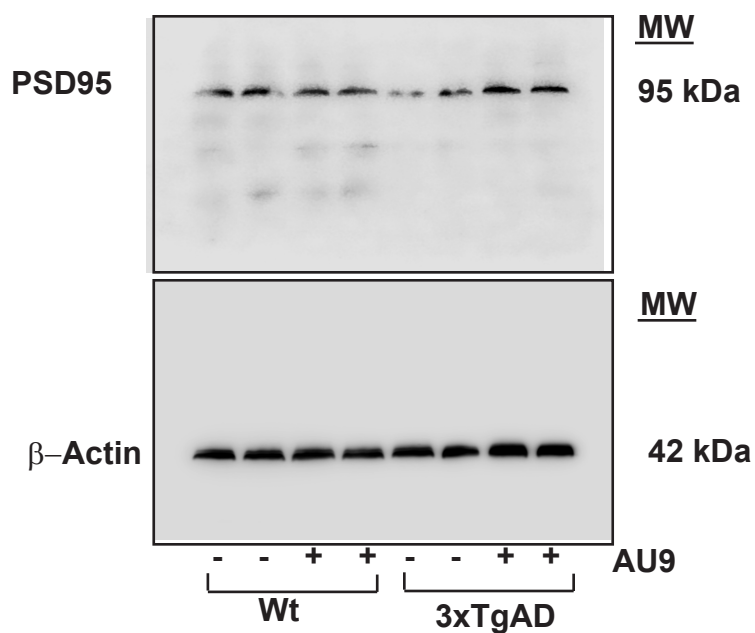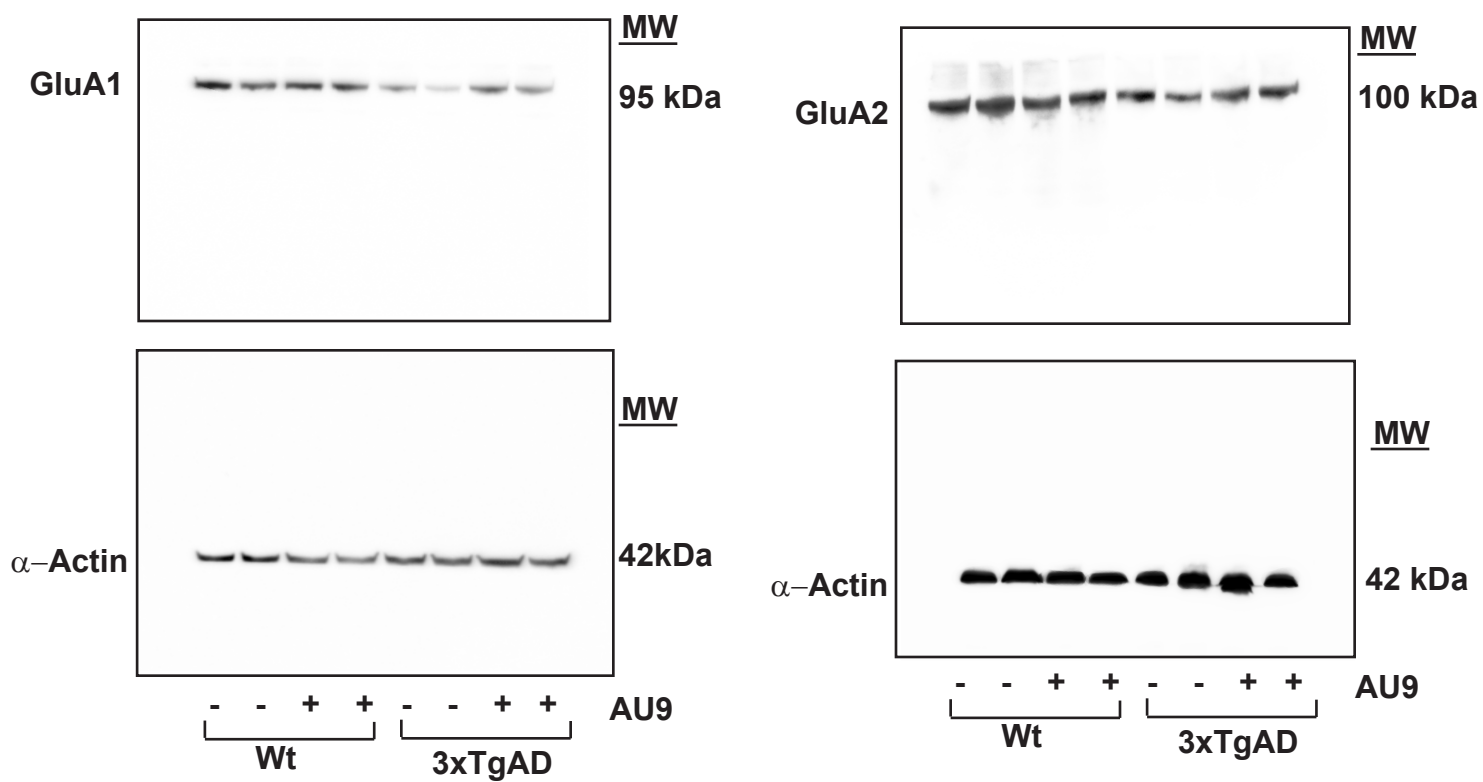



Supplemental Figure S9: Western whole blots for inflammatory markers

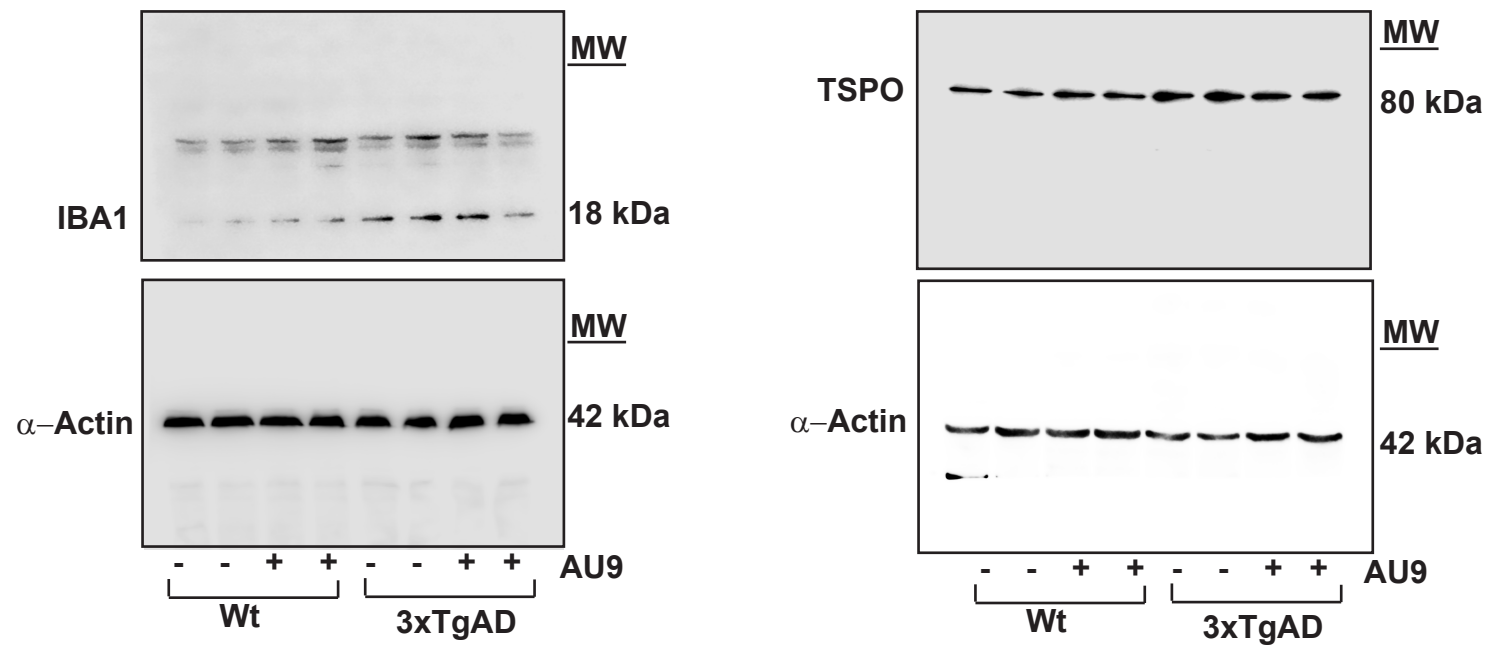

Supplement: s1 [file s1]
